# Supplementary material for: Characterization of Anaerobic Rumen Fungal Community Composition in Yak, Tibetan Sheep and Small Tail Han Sheep Grazing on the Qinghai-Tibetan Plateau
Source: PubMed Central journal article supplement (PMC7023293; doi:10.3390/ani10010144), 2020-01-16
Supplement: animals-10-00144-s001.pdf [file animals-10-00144-s001.pdf]

## Supplementary Materials

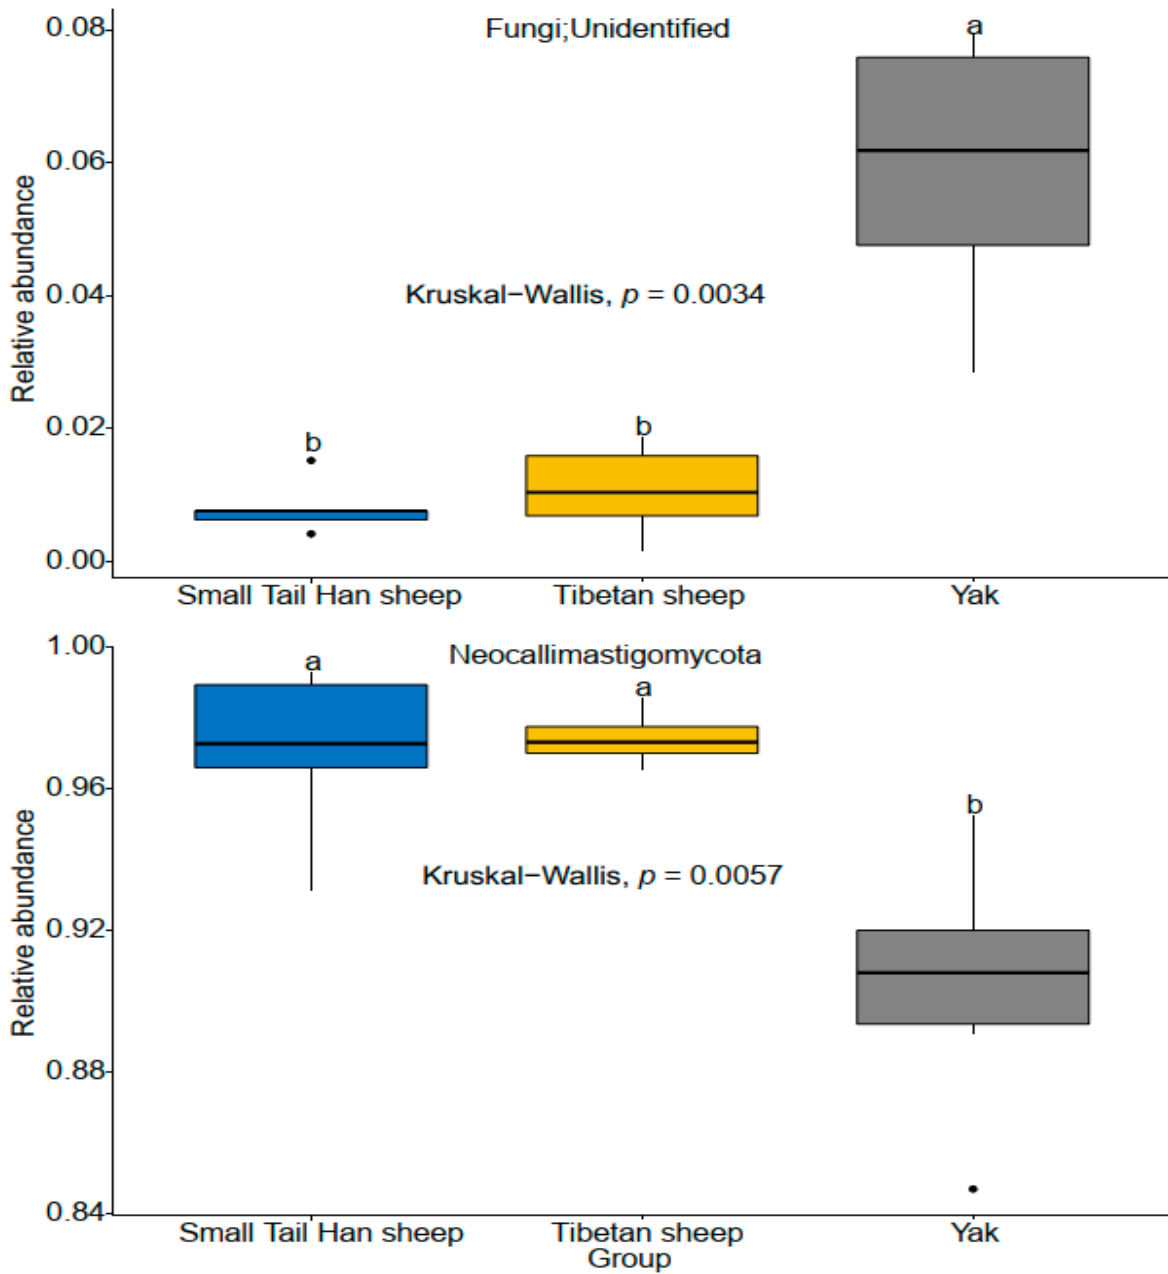

**Figure S1.** The significantly different phyla among three ruminant species. The Wilcoxon test was used to determine the significant level between two animal groups, while Kruskal-Wallis test was used to calculate the significant level among three animal groups. a, b Different letters indicate a significant difference between animal species ( $P < 0.05$ ).

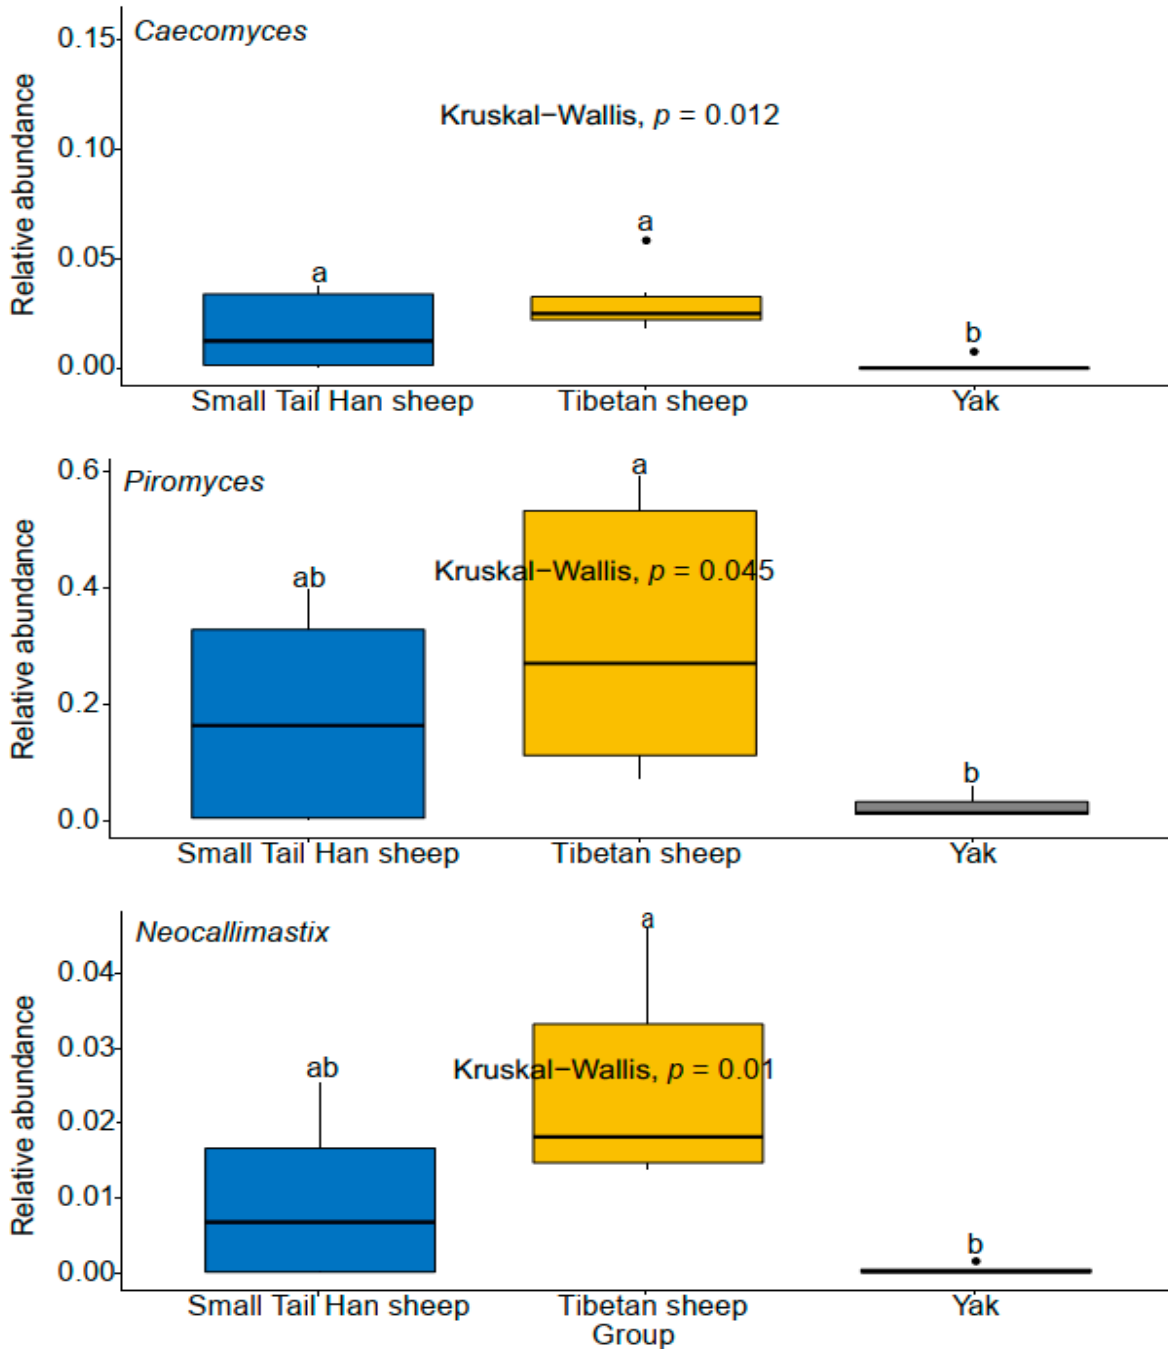

**Figure S2.** Genera with significant differences in three ruminant species. The Wilcoxon test was used to determine the significant level between two animal groups, while Kruskal-Wallis test was used to calculate the significant level among three animal groups. a, b Different letters indicate a significant difference between animal species ( $P < 0.05$ ).

**Table S1.** The distribution of sequences and OTUs in all samples

| Sample ID | Group                | Sequence count | Number of OTU |
|-----------|----------------------|----------------|---------------|
| Y7        | Yak                  | 84077          | 255           |
| Y8        | Yak                  | 82390          | 226           |
| Y9        | Yak                  | 84238          | 209           |
| Y10       | Yak                  | 80127          | 180           |
| Y11       | Yak                  | 84359          | 204           |
| Y12       | Yak                  | 75078          | 187           |
| Z104      | Tibetan sheep        | 83878          | 157           |
| Z106      | Tibetan sheep        | 82135          | 138           |
| Z109      | Tibetan sheep        | 77128          | 200           |
| Z113      | Tibetan sheep        | 90305          | 131           |
| Z121      | Tibetan sheep        | 89161          | 177           |
| Z123      | Tibetan sheep        | 80350          | 173           |
| X202      | Small Tail Han sheep | 95412          | 169           |
| X208      | Small Tail Han sheep | 92178          | 185           |
| X212      | Small Tail Han sheep | 77794          | 146           |
| X216      | Small Tail Han sheep | 85010          | 232           |
| X218      | Small Tail Han sheep | 89514          | 150           |
| X221      | Small Tail Han sheep | 96619          | 108           |

**Table S2.** The topological features at each ruminant species

| Taxa                             | node.degree | betweenness centrality | closeness centrality | node.transitivity |
|----------------------------------|-------------|------------------------|----------------------|-------------------|
| <b>Small Tail Han sheep</b>      |             |                        |                      |                   |
| No Blast hit;Other               | 9           | 1.19                   | 0.11                 | 0.81              |
| <i>Anaeromyces</i>               | 7           | 0.68                   | 0.09                 | 0.81              |
| <i>Caecomycetes</i>              | 8           | 0.88                   | 0.10                 | 0.82              |
| <i>Cyllamyces</i>                | 8           | 0.88                   | 0.10                 | 0.82              |
| <i>Neocallimastix</i>            | 7           | 0.68                   | 0.09                 | 0.81              |
| <i>Oontomyces</i>                | 7           | 0.31                   | 0.09                 | 0.90              |
| <i>Orpinomyces</i>               | 9           | 1.19                   | 0.11                 | 0.81              |
| <i>Piromyces</i>                 | 8           | 0.62                   | 0.10                 | 0.86              |
| Neocallimastigaceae;unidentified | 7           | 0.31                   | 0.09                 | 0.90              |
| unidentified                     | 6           | 0.29                   | 0.08                 | 0.87              |
| <b>Tibetan sheep</b>             |             |                        |                      |                   |
| No Blast hit;Other               | 7           | 0.33                   | 0.11                 | 0.90              |
| <i>Anaeromyces</i>               | 8           | 0.48                   | 0.13                 | 0.89              |
| <i>Caecomycetes</i>              | 7           | 0.14                   | 0.11                 | 0.95              |
| <i>Cyllamyces</i>                | 8           | 0.48                   | 0.13                 | 0.89              |
| <i>Neocallimastix</i>            | 7           | 0.14                   | 0.11                 | 0.95              |

|                                  |   |      |      |      |
|----------------------------------|---|------|------|------|
| <i>Orpinomyces</i>               | 7 | 0.33 | 0.11 | 0.90 |
| <i>Piromyces</i>                 | 8 | 0.48 | 0.13 | 0.89 |
| Neocallimastigaceae;unidentified | 6 | 0.14 | 0.10 | 0.93 |
| unidentified                     | 8 | 0.48 | 0.13 | 0.89 |
| <b>Yak</b>                       |   |      |      |      |
| No Blast hit;Other               | 5 | 0.17 | 0.08 | 0.90 |
| <i>Anaeromyces</i>               | 7 | 0.62 | 0.09 | 0.86 |
| <i>Caecomyces</i>                | 7 | 0.37 | 0.09 | 0.90 |
| <i>Cyllamyces</i>                | 6 | 0.00 | 0.08 | 1.00 |
| <i>Neocallimastix</i>            | 8 | 0.98 | 0.10 | 0.82 |
| <i>Oontomyces</i>                | 6 | 0.62 | 0.08 | 0.80 |
| <i>Orpinomyces</i>               | 7 | 0.82 | 0.09 | 0.81 |
| <i>Piromyces</i>                 | 8 | 1.40 | 0.10 | 0.79 |
| Neocallimastigaceae;unidentified | 9 | 2.02 | 0.11 | 0.75 |
| unidentified                     | 9 | 2.02 | 0.11 | 0.75 |

---
